# Supplementary material for: A Snapshot of CNVs in the Pig Genome
Source: PLoS One. 2008 Dec 16;3(12):e3916. doi: 10.1371/journal.pone.0003916 (PMC2596487; doi:10.1371/journal.pone.0003916)
Supplement: Data S1 — RT-PCR primers, results and correlation with array CGH (0.07 MB XLS) [file pone.0003916.s001.xls]

## Sheet: RT-PCR primers
Supplementary data: RT-PCR primers, results and correlation with array CGH
Primers for the control region used
Col10_F_39 - aagcttcaaacaggggtacaat
Col10_R_39 - ccacttggaatgttaccctaatg
CNVR ID	Chr	Start	End	Length.bp	Forward primer ID	sequence	Start *	End *	Length	Reverse primer ID	sequence	Start *	End *	Length
2	4	7560864	7564463	3600	F_77	cagtgggtatcacccttcaga	2370	2390	21	R_77	gctgtttggaaatccaaggt	2419	2438	20
6	4	41748621	41758338	9718	F_6	caacaactgaagctattgttatctcat	3425	3441	17	R_6	ttttctctcacattagatctttccag	3472	3497	26
7	4	50753651	50761743	8093	F_48	ggcaatagtttgcacccatc	4369	4388	20	R_48	gacttgtggttgccaaagg	4428	4446	19
12	7	23821562	23838973	17412	F_33	gcgaatcgttccaaagacc	6738	6756	19	R_33	cttatggctggtaagctgtcg	6777	6797	21
23	7	115040167	115050693	10527	F_20	gggaatgcttcacaaacagg	º	º	20	R_20	ggaggacaggattccaaaca	º	º	20
28	14	71252362	71281840	29479	F_79	agaggtggtcttttccgactc	13024	13044	21	R_79	gatcccatgggctactgtttt	13063	13083	21
33	14	126779081	126784999	5919	F_21	caaattggagccgtagcc	4181	4198	18	R_21	cagctcggatcctgcatt	4223	4240	18
37	17	50554656	50559679	5024	F_74	ggaggccccaaagctagt	3683	3700	18	R_74	tgtgtcaccattcctctctcc	3722	3742	21
* The start and end position of the primers are relative to the position of the CNVRs
º These primers were designed outside the boundary of the CNVR region
						Delta Ct values between control and test amplicons
Note: For the CNVRs 2 and 12 the reference animal was not used in RT-PCR

## Sheet: Correlation RT-PCR arrayCGH
CNVR ID 2				CNVR ID 7				CNVR ID 28				CNVR ID 37
Animals	Quantity mean (RT-PCR)	Log2ratio (arrayCGH)		Animals	Quantity mean (RT-PCR)	Log2ratio (arrayCGH)		Animals	Quantity mean (RT-PCR)	Log2ratio (arrayCGH)		Animals	Quantity mean (RT-PCR)	Log2ratio (arrayCGH)
A	0.511787	-0.5615		A	0.529296	-0.394693		A	0.960754	0.124708		A	0.859132	0.419351
B	0.925894	-0.0439852		B	0.642966	-0.42639		B	2.1106	0.559		B	0.899096	0.172677
C	1.03665	-0.0111831		C	0.119843	-0.104317		C	1.87732	0.544		C	0.741413	0.455833
D	0.529511	-0.551		D	0.0794384	-1.14693		D	0.944703	0.0112488		D	0.704768	0.394726
E	1.12813	-0.0983405		E	0.546797	-0.507		E	0.978259	0.0433538		E	0.719196	0.230663
G	1.17053	0.0920191		G	0.577185	-0.615		G	1.86784	0.614		G	0.924653	0.206214
H	1.27357	0.0613106		H	0.155291	-1.567		H	1.87288	0.613		H	0.712551	0.754
J	0.505323	-0.706		J	0.119757	-0.595905		J	1.06396	0.114826		J	0.852252	0.564
K	0.905292	0.0110829		K	0.51916	-0.482485		K	2.05557	0.69		K	0.804303	0.517072
L	0.538725	-0.605		L	0.449848	-0.442102		L	1.05323	0.0345491		L	0.938002	0.478477
M	1.11434	0.193104		M	0	-1.34122		M	1.73035	0.524		M	0.845671	0.28577
N	1.33969	0.209471		N	0.598868	-0.707		N	1.01084	0.0788314		N	1.02404	0.672
				R	1.07476	NA		R	1.11755	NA		R	0	NA
Note1: For the animals in which the array CGH calling CNV pipeline didn´t detect a CNV, a median over the log2ratios of the probes for each one of those animals was calculated (in the CNV region).
Note2: It should be stressed that computing the correlation between 2 different variables (from RT-PCR and arrayCGH), each one measuring different photochemical reactions, will not always give a good correlation even if they should. Another possibility could be to correlate the copy numbers that each animal has, according with the log2ratios and mean quantity. But since our data is rather noisy, …
